# Supplementary material for: A protocol to inject ocular drug implants into mouse eyes
Source: PubMed Central journal article supplement — STAR Protoc. 2022 Jan 29;3(1):101143. doi: 10.1016/j.xpro.2022.101143 (PMC8810562; doi:10.1016/j.xpro.2022.101143), 2022-01-29
Supplement: mmc1.pdf [file mmc1.pdf]

**Supplemental Figure**

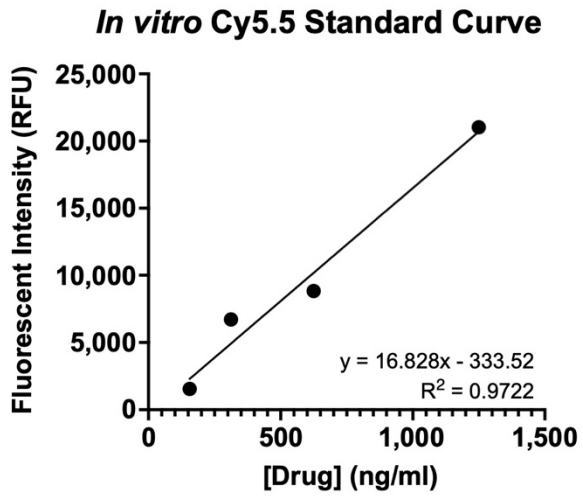

Figure S1. Standard curve for *in vitro* quantification of Cy5.5 remaining in implants, related to Figure 3 and “Before you begin” Step 12-c.
